# Supplementary material for: Effects of Hydration and Temperature on the Microstructure and Transport Properties of Nafion Polyelectrolyte Membrane: A Molecular Dynamics Simulation
Source: MDPI journal article supplement (doi:10.3390/membranes11090695), 2021-09-08
Supplement: s1 [file s1]

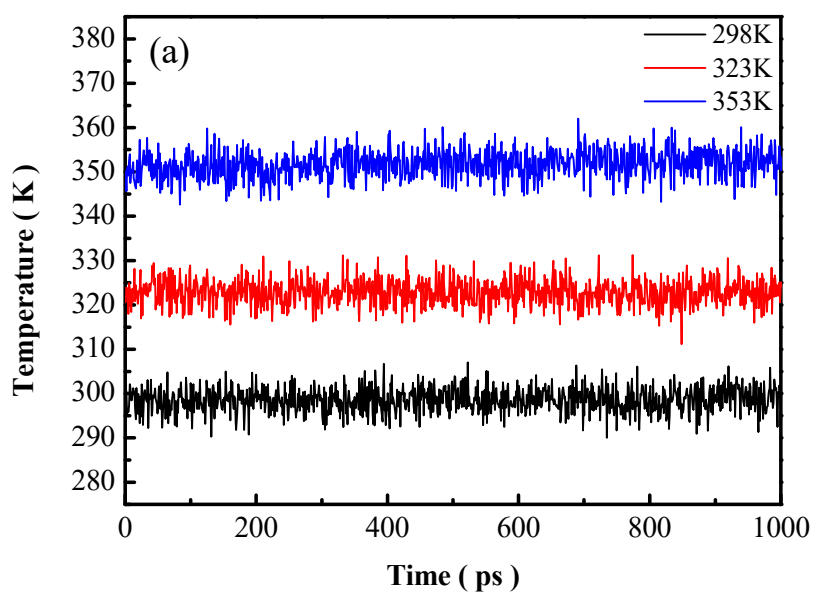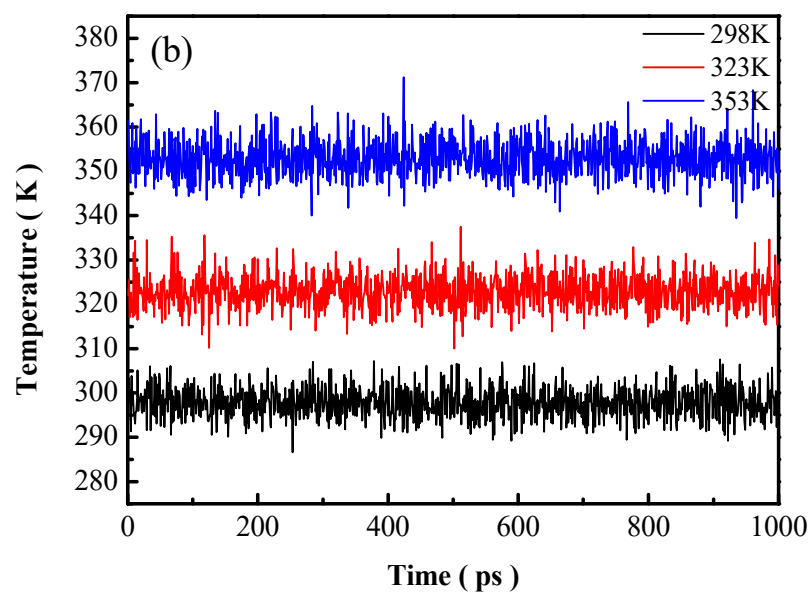

Figure S1. Monitored temperatures in NVE simulations for  $\lambda=16$ .

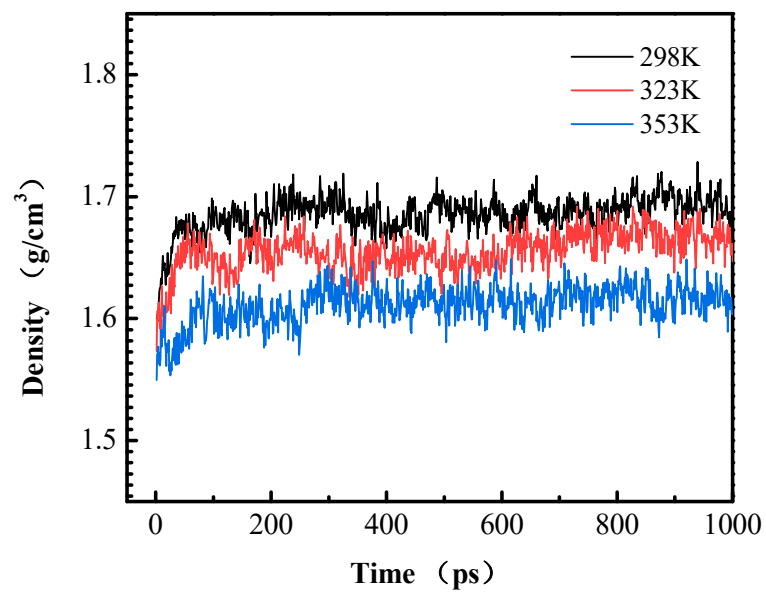

Figure S2. The densities in the course of the equilibration procedures for  $\lambda=13$ .
